# Supplementary material
Source: publisher figshare collection journal article supplement (https://gsapubs.figshare.com/ndownloader/files/23319761)

Lei Huang, Chi-yang Liu, Jun-feng Zhao, and Dong-dong Zhang, 2020, Synrift basin inversion: Significant role of synchronous strike-slip motion in a rift basin: GSA Bulletin, <https://doi.org/10.1130/B35435.1>.

## Data Repository

**Figure DR1.** Noninterpreted geological cross-section of the Liaodong Bay sub-basin of the BBB. See Fig. 3 for interpreted one.

**Figure DR2.** Noninterpreted seismic sections through the eastern part of the Liaodong Bay sub-basin (northern segment). See Fig. 5 for their interpreted counterparts.

**Figure DR3.** Noninterpreted seismic sections through the eastern part of the Liaodong Bay sub-basin (southern segment). See Fig. 6 for their interpreted counterparts.

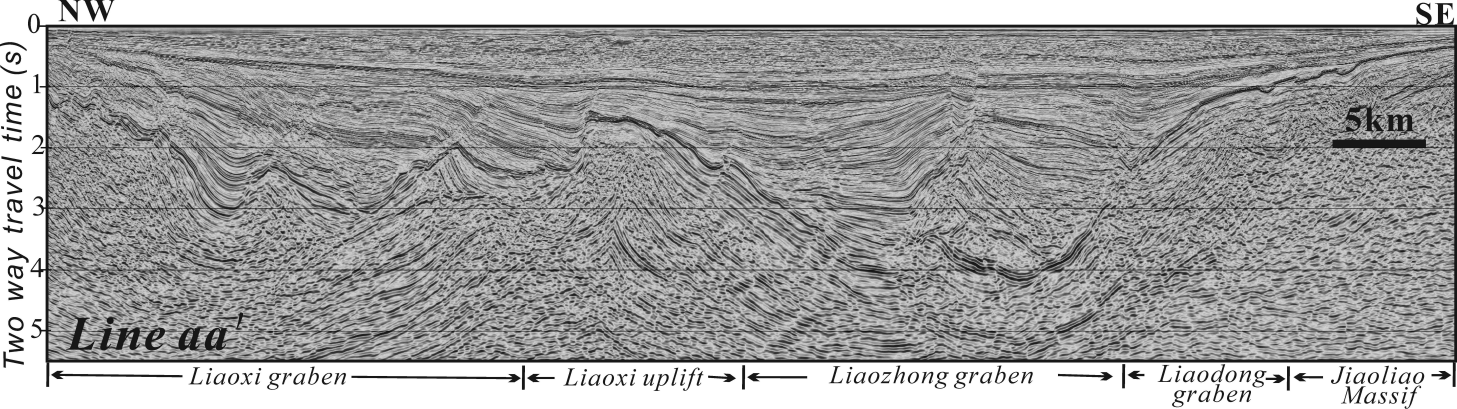

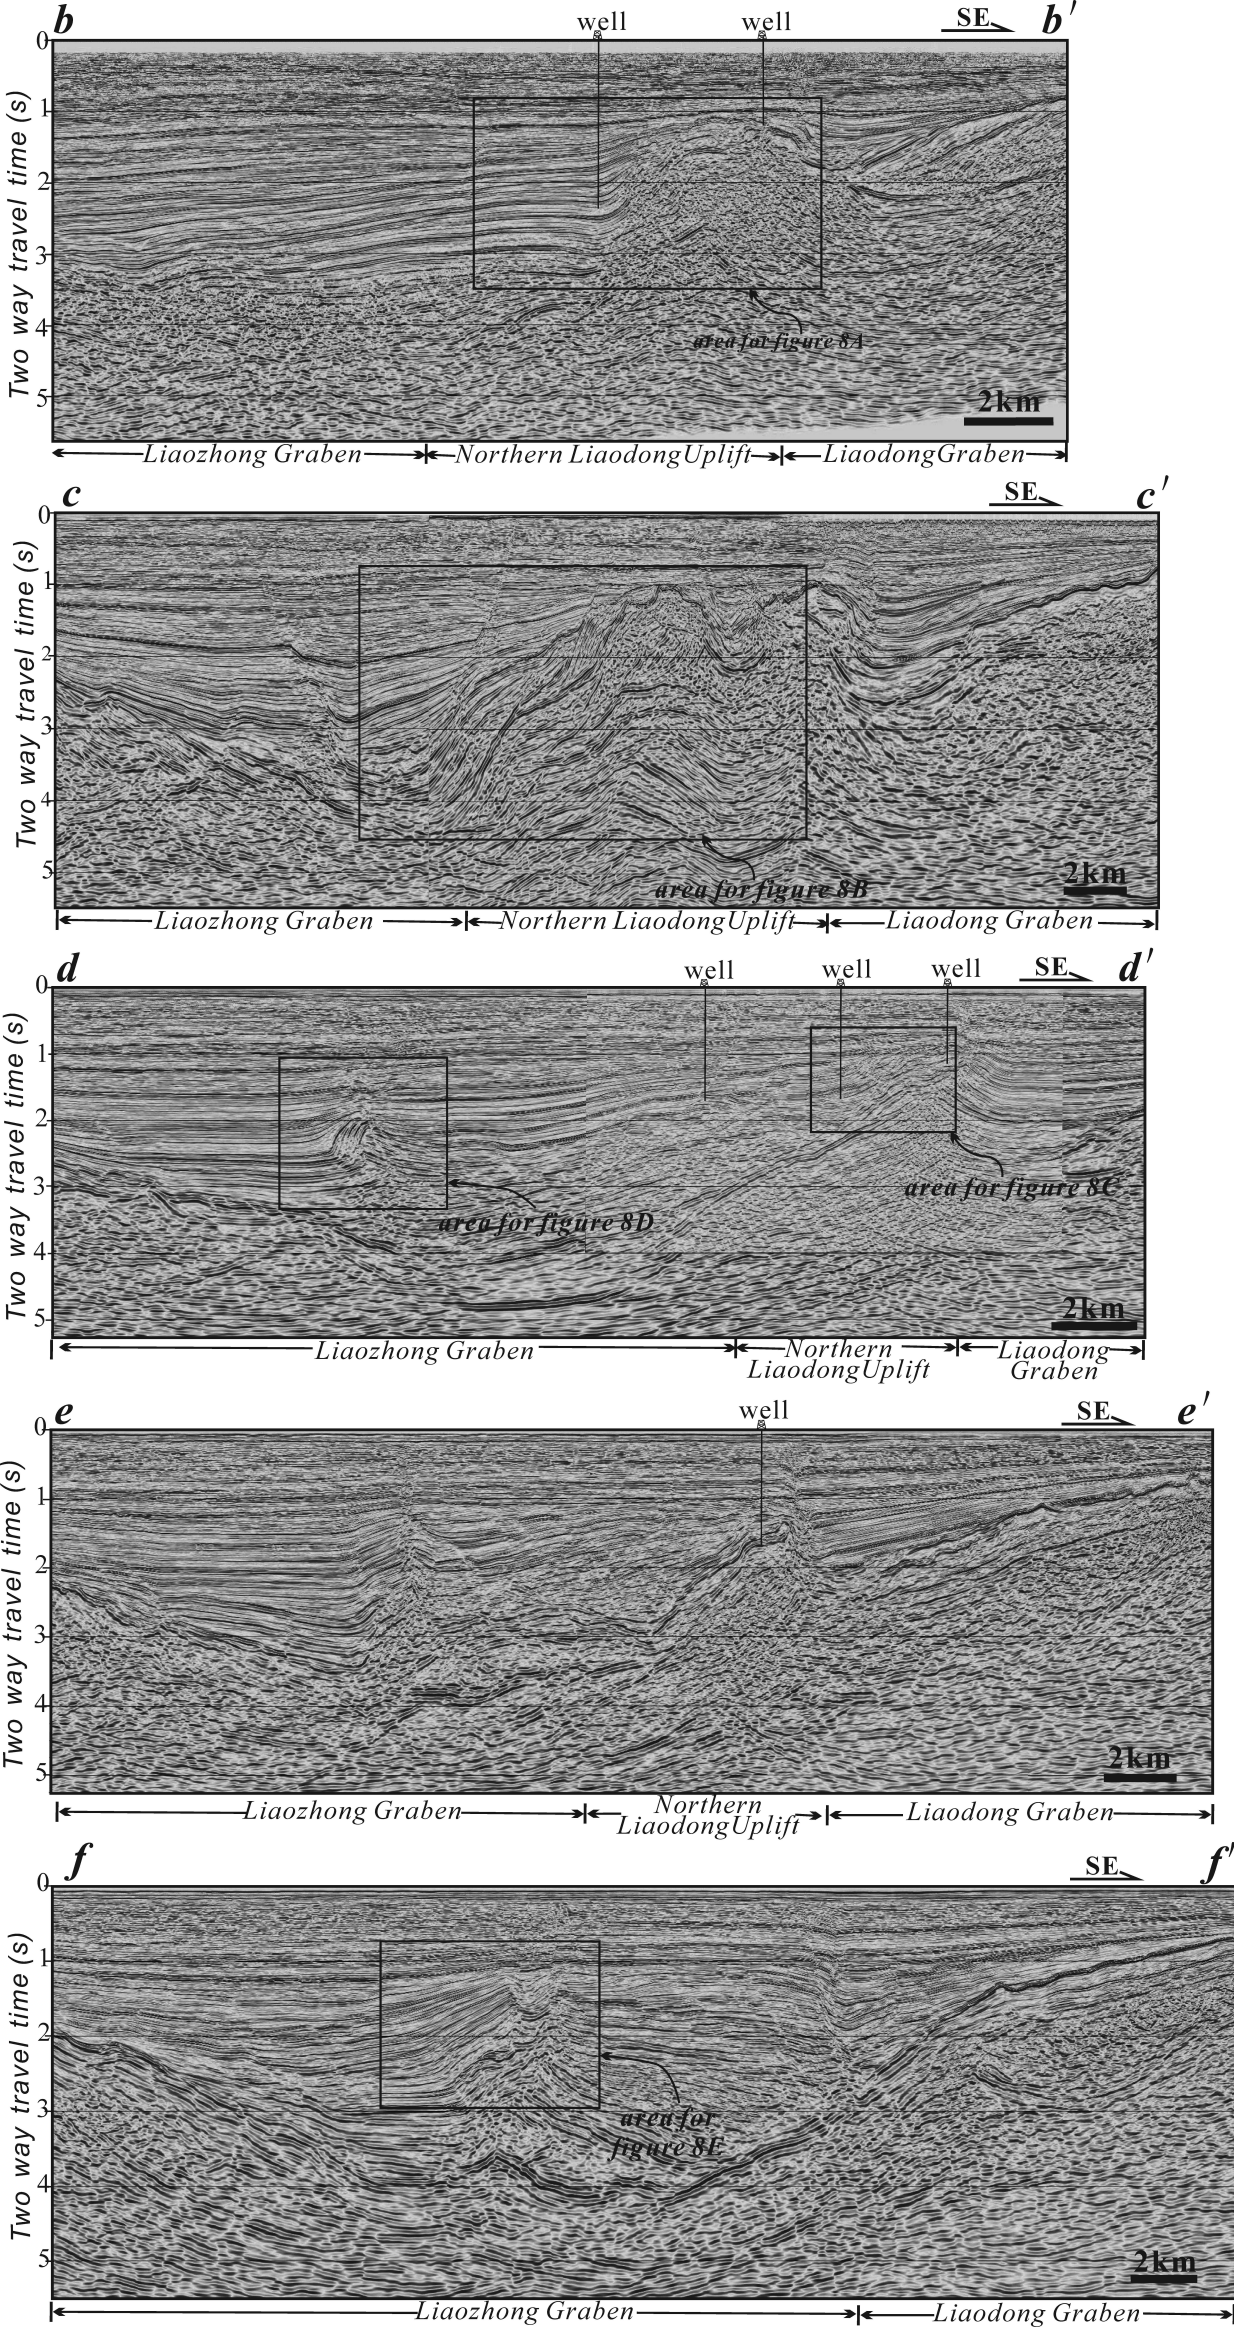

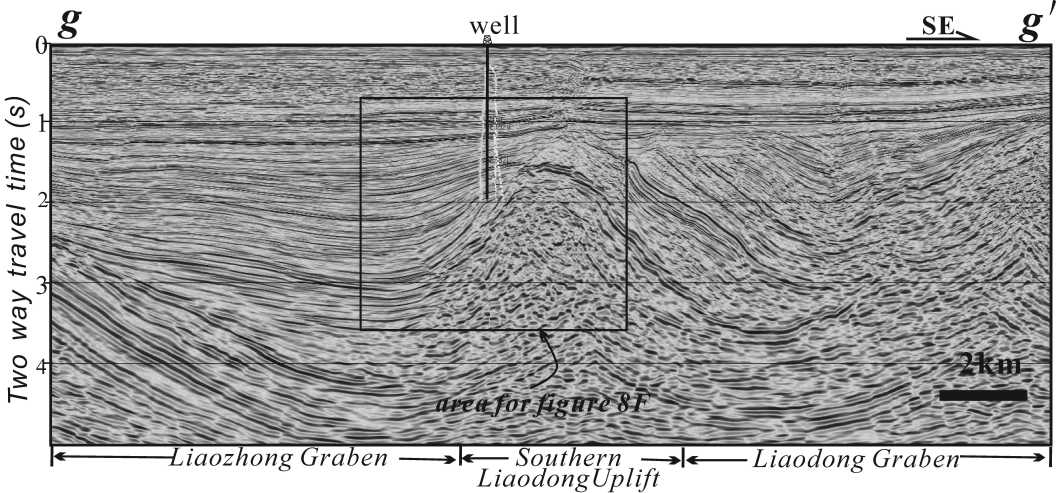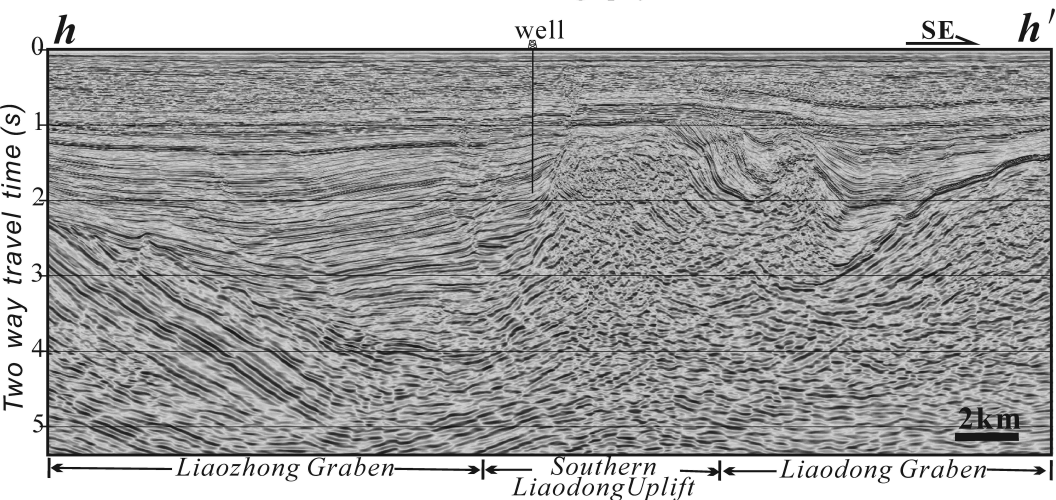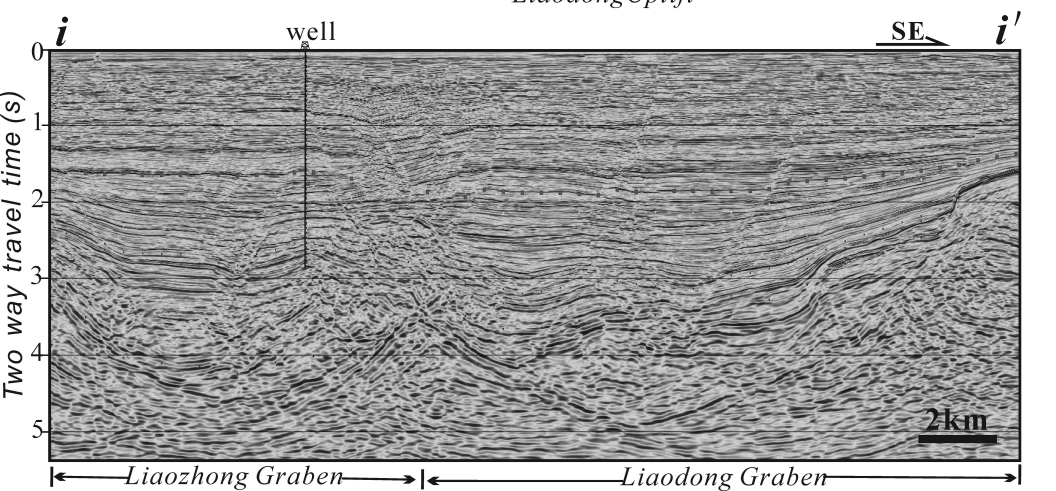

Supplement: Supplementary file 1 [file 23319761]
